# Supplementary material
Source: Springer Nature journal article supplement (https://www.springermedizin.de/resource/supplementary/12961_2004_13_MOESM3_ESM.pdf/9571216)

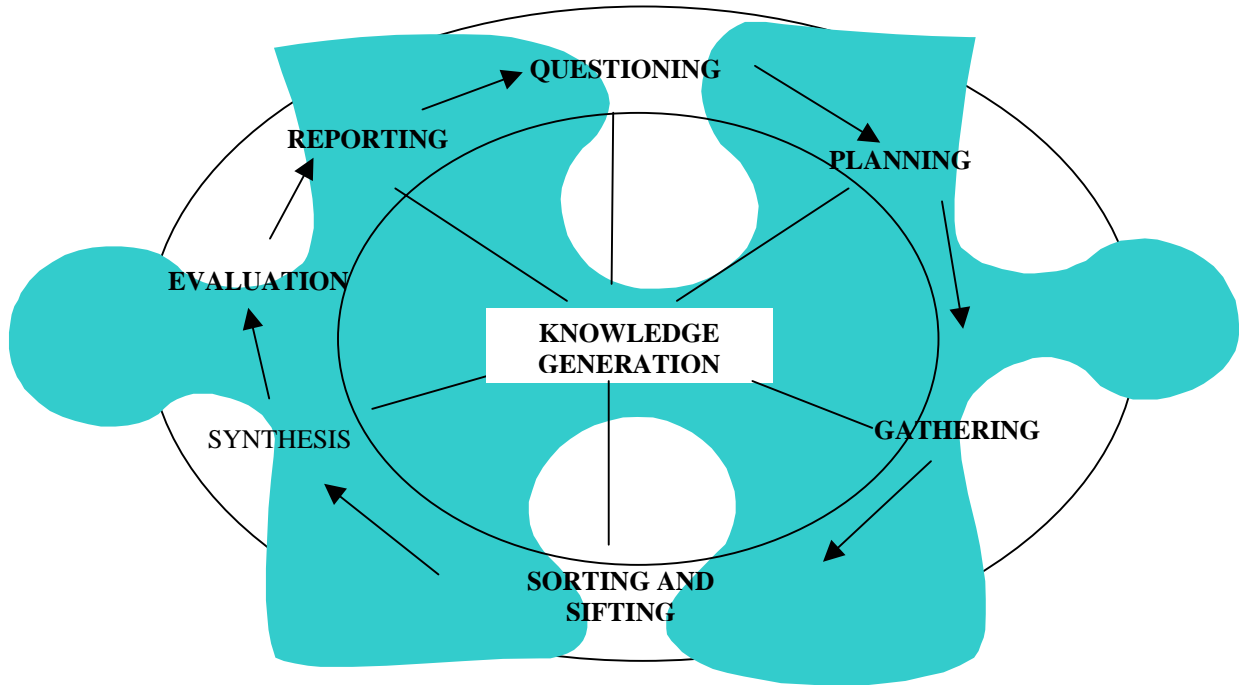

Supplement: MOESM3 [file 9571216]
